# Supplementary material for: Thiamine Supplementation Alleviates Lipopolysaccharide-Triggered Adaptive Inflammatory Response and Modulates Energy State via Suppression of NFκB/p38 MAPK/AMPK Signaling in Rumen Epithelial Cells of Goats
Source: MDPI journal article supplement (doi:10.3390/antiox11102048), 2022-10-18
Supplement: s1 [file s1]

**Supplementary Table.**

**Table S1.** Primers for quantitative real-time PCR.

| Gene Name <sup>1</sup>           | Sequences (5'-3') <sup>2</sup>                                                  | GenBank accession | Amplification size | Efficiency <sup>3</sup> (%) |
|----------------------------------|---------------------------------------------------------------------------------|-------------------|--------------------|-----------------------------|
| <b><i>Inflammation</i></b>       |                                                                                 |                   |                    |                             |
| IL-1 $\beta$                     | <b>F:</b> CATGTGTGCTGAAGGCTCTC<br><b>R:</b> AGTGTCGGCGTATCACCTTT                | XM_013967700.2    | 172                | 93.50                       |
| IL-6                             | <b>F:</b> ACACTGACATGCTGGAGAAGATGC<br><b>R:</b> CCGAATAGCTCTCAGGCTGAACTG        | NM_001285640.1    | 116                | 91.26                       |
| IL-10                            | <b>F:</b> AAACAAGAGCAAGGCGGTGGAG<br><b>R:</b> ACTCACTCATGGCTTTGTAGACACC         | XM_005690416.3    | 83                 | 95.82                       |
| TNF- $\alpha$                    | <b>F:</b> CAAGTAACAAGCCGGTAGCC<br><b>R:</b> AGATGAGGTAAAGCCCGTCA                | XM_005696606.3    | 153                | 101.30                      |
| MAPK14                           | <b>F:</b> ACAGATGACCACGTTTCAGTTCCTTATC<br><b>R:</b> TCTTCAGCTCACAGTCTTCATTCACAG | XM_018038791      | 130                | 103.55                      |
| <b><i>Thiamine transport</i></b> |                                                                                 |                   |                    |                             |
| SLC19A2                          | <b>F:</b> GAGGAACAGGAATCCAAGCCAGAC<br><b>R:</b> GAGCAGAGGGCGAGAGGAGTAG          | XM_018060285.1    | 90                 | 96.22                       |
| SLC19A3                          | <b>F:</b> TGGACCTACTCTTACCTGGCACTAC<br><b>R:</b> CTGGAGGATGATGACTGGCTTG TAG     | XM_005676643.3    | 84                 | 97.88                       |
| SLC25A19                         | <b>F:</b> CAGCTCCTTGAAGCGTGCCTAC<br><b>R:</b> TCCAGTGGGTATGTGAGGGTCTTG          | XM_013972239.2    | 126                | 92.15                       |
| <b><i>Proliferation</i></b>      |                                                                                 |                   |                    |                             |
| CCND1                            | <b>F:</b> TCTCCTATCACCGCCTGACA<br><b>R:</b> TTGGGGTCCAAGTTCTGCTG                | XM_018043271.1    | 139                | 102.63                      |
| CCNA2                            | <b>F:</b> TCCTTGAAGCTGACCCGTTC<br><b>R:</b> TCCCTGATTGCTTGCTGAGG                | XM_018056659.1    | 226                | 95.13                       |

|                                 |                                                                               |                |     |        |
|---------------------------------|-------------------------------------------------------------------------------|----------------|-----|--------|
| CDK2                            | <b>F:</b> AAGTGGCTGCATCACAAGGA<br><b>R:</b> CTGGCCAAACCACCTCATCT              | XM_013963900.1 | 150 | 90.86  |
| CDK6                            | <b>F:</b> GACCAGCAGTATGAGTGCGT<br><b>R:</b> TCTGCACTCTCACACGCTTC              | XM_018047425.1 | 118 | 98.50  |
| <i><b>Energy metabolism</b></i> |                                                                               |                |     |        |
| AMPK $\alpha$ 1                 | <b>F:</b> GAGATCAGGCTCAGTTAGCAACTATCG<br><b>R:</b> CAGGAGAAGAGTCAAGTGAGGTTAAG | XM_018065500.1 | 122 | 90.54  |
| AMPK $\alpha$ 2                 | <b>F:</b> TGGTGGAGCAGAGGTCTGGTTC<br><b>R:</b> GGTCAAGGAGCCCGTGAGAGAG          | XM_018044652.1 | 137 | 97.70  |
| SIRT1                           | <b>F:</b> TCTTGCGGCAGTAACAGTGATAGTG<br><b>R:</b> ACATCAGCATCATCTTCCAAACCATTG  | XM_018042148.1 | 116 | 92.77  |
| PGC1 $\alpha$                   | <b>F:</b> GGCAGATACACTCTTCCACAGATTCC<br><b>R:</b> CGGCTCGGATTTCTGGTCTTG       | NM_001285631.1 | 120 | 93.62  |
| <i><b>Respiratory chain</b></i> |                                                                               |                |     |        |
| Complex I                       | <b>F:</b> GAGCGGATTACACCACAGACAG<br><b>R:</b> TCAGAAGACAGCCAGCGGTAGG          | XM_005680980.3 | 137 | 95.45  |
| Complex II                      | <b>F:</b> CCAGGGAGGACTTCAAGGAGAGG<br><b>R:</b> AGTGCTGCTCAAACGGCTTCTTC        | XM_018065656.1 | 87  | 103.20 |
| Complex III                     | <b>F:</b> GGCTCTAGCTGCTGGTTCATACAC<br><b>R:</b> TCCACTTGCTGCCATTGACTTCC       | XM_005697593.3 | 130 | 92.85  |
| Complex IV                      | <b>F:</b> CTTTGCCTCTGAAGTCCTTGAGTCG<br><b>R:</b> CCGAGTGGAGCCAGGAGTTGAG       | XM_005697738.3 | 150 | 94.30  |
| Complex V                       | <b>F:</b> GACTGCCTCCCATCCTAAATGCC<br><b>R:</b> CAAGCCTTCTGTACCGTCCATAGC       | XM_005680331.2 | 125 | 105.48 |
| <i><b>Reference genes</b></i>   |                                                                               |                |     |        |
| $\beta$ -actin                  | <b>F:</b> GAATCCTGCGGCATTCACG<br><b>R:</b> GGGCGCGATGATCTTGA                  | NM_001314342.1 | 189 | 95.90  |
| GAPDH                           | <b>F:</b> GGGTCATCATCTCTGCACCT                                                | XM_005680968.3 | 176 | 101.76 |

---

|       |                                 |                |     |       |
|-------|---------------------------------|----------------|-----|-------|
|       | <b>R:</b> GGTCATAAGTCCCTCCACGA  |                |     |       |
| HPRT1 | <b>F:</b> CACCAGCTGGCTCCGTTATG  | XM_018044253.1 | 163 | 95.04 |
|       | <b>R:</b> AGTCGTTCCGGTCCTGTCCAT |                |     |       |

---

<sup>1</sup>*IL-1β* = interleukin-1β; *TNF-α* = tumor necrosis factor alpha; *MAPK14* = mitogen-activated protein kinase 14 (p38); *SLC25A2* = solute carrier family 19, member 2 (THTR1); *SLC19A3* = solute carrier family 19, member 3 (THTR2); *SLC25A19* = mitochondrial thiamine pyrophosphate transporter (MTPPT); *CCND1* = cyclin D1; *CCNA2* = cyclin A2; *CDK2* = cyclin dependent kinase 2; *AMPKα1* = protein kinase AMP-activated catalytic subunit alpha 1; *SIRT1* = sirtuin 1; *PGC1α* = PPARG coactivator 1 alpha; *GAPDH* = glyceraldehyde-3-phosphate dehydrogenase; *HPRT1* = hypoxanthine phosphoribosyltransferase 1.

<sup>2</sup>F = forward; R = reverse.

<sup>3</sup>Efficiency =  $-1 + 10^{(-1/\text{slope})} \times 100$ .

Supplementary Figure.

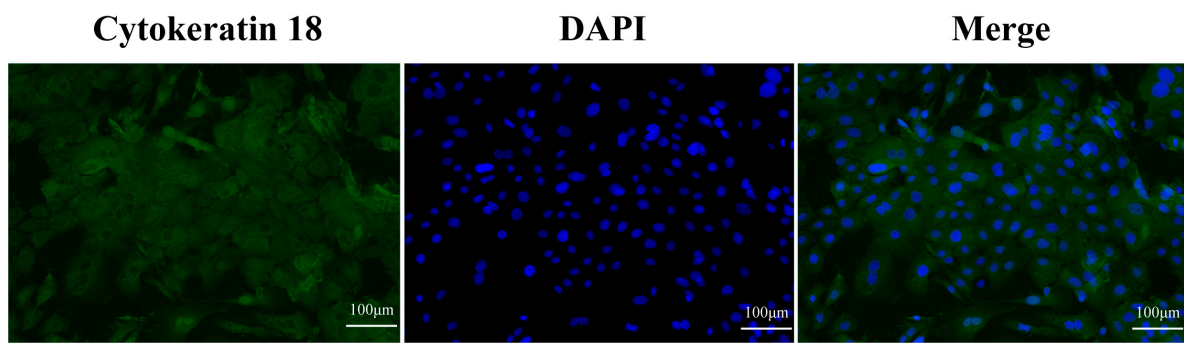

**Figure S1. Immunofluorescence identification of cytokeratin 18 in isolated goat ruminal epithelial cells.** The primary antibody was Cytokeratin 18 (Santa Cruz, sc-32329). Green fluorescence denotes stained proteins and blue denotes the cell nucleus stained with DAPI solution
